# Supplementary material
Source: publisher figshare collection journal article supplement (https://acs.figshare.com/ndownloader/files/4405903)
Supplement: Supplementary file 1 [file 4405903]

**Supporting information**

**A Multi-Phase Electrode Microbial Fuel Cell System that  
Simultaneously Converts Organics Coexisting in Water and Sediment  
Phases into Electricity**

Junyeong An, Hynsoo Moon and In Seop Chang\*

**Summary**

Page S2: Figure S1

Page S3: Figure S2

Page S4: Figure S3

Page S5: Figure S4

Page S6: Table S1

**FIGURE S1. Multi-phase MFC** operation system containing control sets of MFCs: four multi-phase MFCs and duplicated control MFCs (FT-MFC, SMFC-A, and SMFC-B).

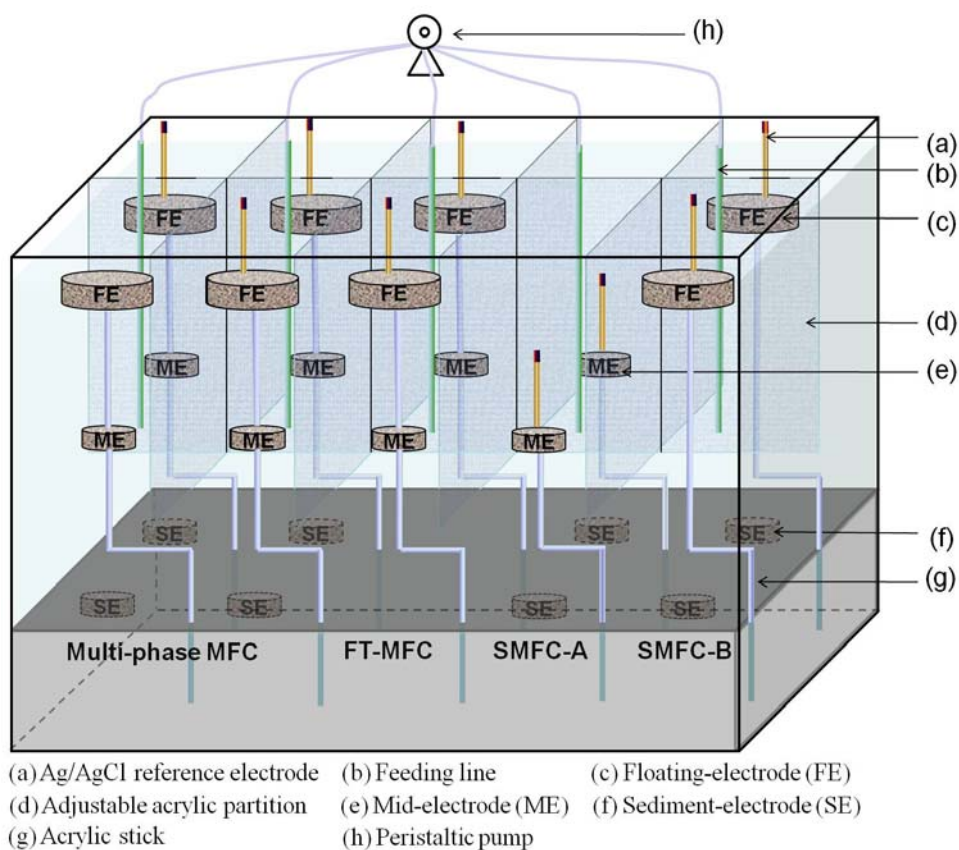

1 **FIGURE S2.** (A): The development of current during continuous acetate supply at C<sub>330</sub>;  
 2 (B): changes of DO at C<sub>330</sub>.

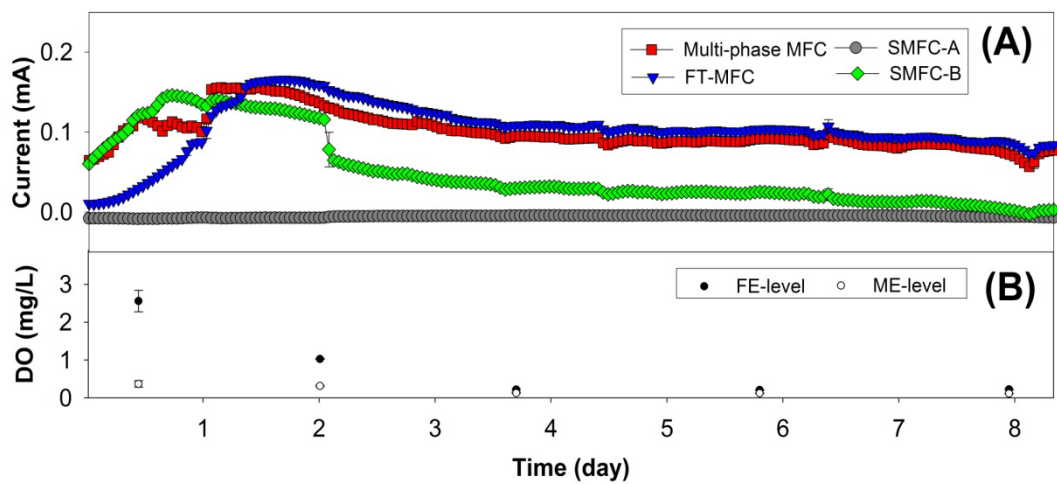

**FIGURE S3.** (A): The development of current of MFCs under continuous acetate supply at  $C_{188}$ ; (B) equilibrium potentials of FE, ME, and SE during operation at  $C_{188}$ ; (C): changes of DO at ME and FE during operation at  $C_{188}$ .

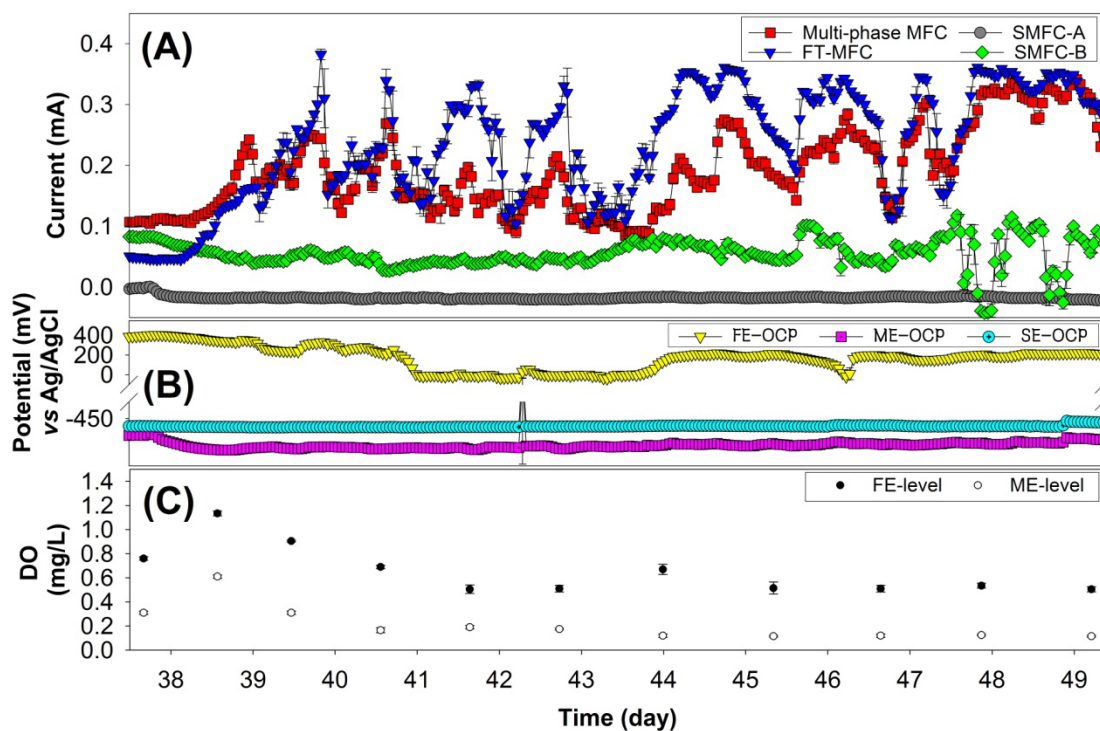

1 **FIGURE S4.** The effect of exposing 1.27 cm of FE to the atmosphere during  
 2 continuous acetate supply at C<sub>330</sub>.

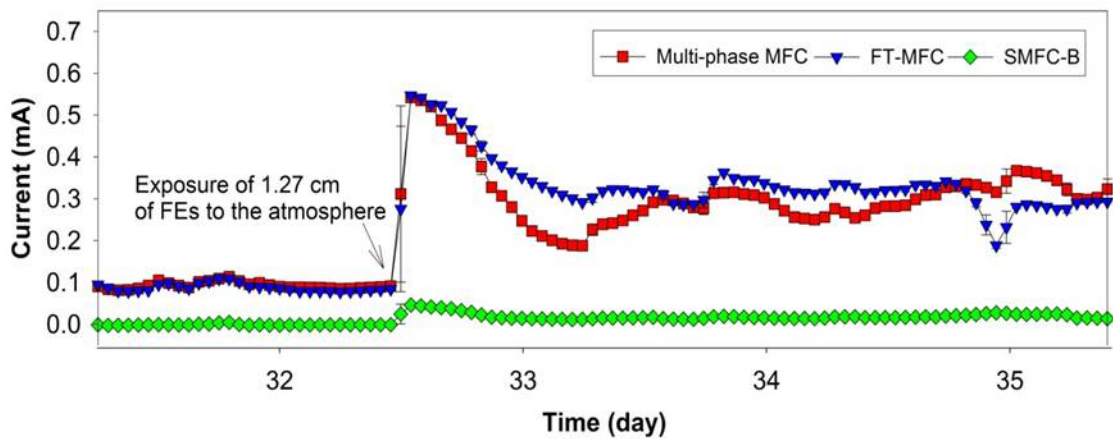

**TABLE S1.** The total coulombs (C) of MFCs and coulombic sums (FT-MFC & SMFC-A, FT-MFC & SMFC-B) are illustrated, integrated over days based on the currents obtained during continuous acetate supply at C<sub>330</sub> and C<sub>188</sub>.

| <i>Operation Mode</i>          | <i>FT-MFC<br/>(C)</i> | <i>SMFC-A<br/>(C)</i> | <i>SMFC-B<br/>(C)</i> | <i><u>Multi-phase</u><br/><u>MFC (C)</u></i> | <i>Sum of SMFC-B<br/>&amp; FT-MFC (C)</i> | <i>Sum of SMFC-A<br/>&amp; FT-MFC (C)</i> |
|--------------------------------|-----------------------|-----------------------|-----------------------|----------------------------------------------|-------------------------------------------|-------------------------------------------|
| Continuous (C <sub>330</sub> ) | 737.0                 | -39.4                 | 388.0                 | 712.0                                        | 1130.0                                    | 698.3                                     |
| Continuous (C <sub>188</sub> ) | 2420.0                | -178.0                | 567.0                 | 1970.0                                       | 2990.0                                    | 2240.0                                    |
